# Supplementary material for: C3-symmetry Mo3S4 aminophosphino clusters combining three sources of stereogenicity: stereocontrol directed by hydrogen bond interactions and ligand configuration
Source: Royal Society of Chemistry journal article supplement (doi:10.1039/c6dt00755d), 2016-01-01
Supplement: c6dt00755d1.pdf [file c6dt00755d1.pdf]

## Electronic Supplementary Information

# $C_3$ -symmetry $Mo_3S_4$ aminophosphino Clusters Combining Three Sources of Stereogenicity: Stereocontrol directed by Hydrogen Bond Interactions and Ligand Configuration

*Carmina Alfonso,<sup>a</sup> Marta Feliz,<sup>b</sup> Vicent S. Safont,<sup>a</sup> and Rosa Llusar.<sup>\*,a</sup>*

<sup>a</sup> Departament de Química Física i Analítica, Universitat Jaume I, Av. Sos Baynat s/n, 12071 Castelló, Spain.

<sup>b</sup> Instituto de Tecnología Química, CSIC-UPV, Avda. de los Naranjos, s/n, 46022, Valencia, Spain.

**Table S1. Optimized energies (in a.u.) and Cartesian atomic coordinates (in Å) of the computed structures**

**(P)-[Mo-(S<sub>N</sub>,R<sub>C</sub>)]<sup>+</sup>**

E = -2451.18813071 a.u.

|    |             |             |             |
|----|-------------|-------------|-------------|
| Mo | 1.37043500  | -0.86824300 | -0.83290600 |
| P  | 3.14219200  | -2.25847800 | 0.58280200  |
| C  | 4.97946400  | -1.84550400 | 0.65683200  |
| C  | 2.49677100  | -1.66492700 | 3.28595500  |
| H  | 2.46788300  | -0.63068300 | 2.95296400  |
| C  | 5.90455000  | -2.84220700 | 1.04129100  |
| H  | 5.57448300  | -3.85220000 | 1.27489400  |
| C  | 2.76380100  | -2.70458400 | 2.36955100  |
| C  | 2.26362700  | -1.95991300 | 4.64103900  |
| H  | 2.06651600  | -1.15088700 | 5.33978500  |
| C  | 7.72306400  | -1.22486200 | 0.89284400  |
| H  | 8.77981400  | -0.98580500 | 0.98087900  |
| C  | 2.28758100  | -3.29443800 | 5.09127700  |
| H  | 2.10869200  | -3.52167600 | 6.13916900  |
| C  | 2.78900400  | -4.04014600 | 2.82277200  |
| H  | 2.99232000  | -4.86078600 | 2.14008900  |
| C  | 5.43224000  | -0.53661800 | 0.40078300  |
| H  | 4.73234000  | 0.23165000  | 0.09196300  |
| C  | 2.54804500  | -4.33324800 | 4.17856200  |
| H  | 2.56923400  | -5.36566300 | 4.51804600  |
| C  | 6.80104200  | -0.22940300 | 0.52145200  |
| H  | 7.14388000  | 0.78197200  | 0.31866500  |
| C  | 7.27139700  | -2.53387900 | 1.15310800  |
| H  | 7.97613600  | -3.30671800 | 1.44903300  |
| S  | 0.00608900  | 0.00362300  | -2.65607600 |
| S  | -0.08695900 | -2.07194000 | 0.61133000  |
| Cl | 3.36342300  | -0.18361200 | -2.26790000 |
| N  | 1.60799700  | -2.75393000 | -2.11010000 |
| H  | 0.79092900  | -3.29701900 | -1.78985500 |
| C  | 1.52558700  | -2.73336700 | -3.62820700 |
| H  | 2.16134600  | -1.91837600 | -3.97863000 |
| H  | 0.49286400  | -2.54596700 | -3.92218100 |
| C  | 2.05149900  | -4.12732300 | -4.09094000 |
| H  | 1.23148700  | -4.76253900 | -4.44099500 |
| H  | 2.75672600  | -4.01146100 | -4.92050700 |
| C  | 3.04026100  | -3.89653500 | -0.37418400 |
| H  | 3.94381000  | -4.49532300 | -0.22422100 |
| H  | 2.17967300  | -4.46312200 | 0.00107700  |
| C  | 2.87244500  | -3.56329400 | -1.85713300 |
| H  | 3.69549600  | -2.91673900 | -2.18413300 |
| C  | 2.74510400  | -4.74962500 | -2.83721600 |
| H  | 3.72337000  | -5.18167000 | -3.07196800 |
| H  | 2.12689900  | -5.54383300 | -2.39745600 |
| Mo | -1.43465300 | -0.75374100 | -0.84137200 |
| P  | -3.52633000 | -1.59196400 | 0.57349300  |

|    |             |             |             |
|----|-------------|-------------|-------------|
| C  | -4.10841500 | -3.38274500 | 0.64771500  |
| C  | -2.70784800 | -1.43145900 | 3.28599300  |
| H  | -1.83647300 | -1.98979700 | 2.95359300  |
| C  | -5.43074800 | -3.66362100 | 1.05969200  |
| H  | -6.11879300 | -2.86044800 | 1.31469000  |
| C  | -3.70816900 | -1.05154500 | 2.36518200  |
| C  | -2.83060500 | -1.08994600 | 4.64433200  |
| H  | -2.05815600 | -1.39455100 | 5.34602300  |
| C  | -4.98682900 | -6.05450800 | 0.88553900  |
| H  | -5.32522100 | -7.08369000 | 0.97451700  |
| C  | -3.94916900 | -0.36103300 | 5.09432200  |
| H  | -4.04498400 | -0.09919200 | 6.14504800  |
| C  | -4.82768100 | -0.32290800 | 2.81782800  |
| H  | -5.61405100 | -0.01823400 | 2.13278600  |
| C  | -3.22604300 | -4.44364200 | 0.36665900  |
| H  | -2.21392400 | -4.23796000 | 0.03786100  |
| C  | -4.94528500 | 0.02309500  | 4.17773800  |
| H  | -5.81211700 | 0.58453200  | 4.51701100  |
| C  | -3.66693600 | -5.77570500 | 0.48736700  |
| H  | -2.98208700 | -6.58964700 | 0.26426100  |
| C  | -5.86929200 | -4.99412700 | 1.17234400  |
| H  | -6.88792800 | -5.20135400 | 1.48978700  |
| S  | -1.74760700 | 1.10015500  | 0.61600500  |
| Cl | -1.83532400 | -2.81338000 | -2.29255900 |
| N  | -3.18218800 | -0.00591800 | -2.11247200 |
| H  | -3.23851900 | 0.97161400  | -1.78618000 |
| C  | -3.12368100 | 0.06446300  | -3.63056300 |
| H  | -2.73083500 | -0.88910900 | -3.98727600 |
| H  | -2.44854900 | 0.87028300  | -3.91873700 |
| C  | -4.59462100 | 0.30225800  | -4.09389800 |
| H  | -4.73562000 | 1.32697000  | -4.45221000 |
| H  | -4.84752000 | -0.37357800 | -4.91745800 |
| C  | -4.88953500 | -0.67247200 | -0.37742600 |
| H  | -5.86202000 | -1.15055000 | -0.22450200 |
| H  | -4.94334000 | 0.35660700  | -0.00271800 |
| C  | -4.51877100 | -0.69104400 | -1.86142100 |
| H  | -4.37713900 | -1.72621500 | -2.19470000 |
| C  | -5.47939400 | 0.02176000  | -2.83783200 |
| H  | -6.34986800 | -0.60042200 | -3.07020400 |
| H  | -5.84685500 | 0.95807800  | -2.39646900 |
| Mo | 0.06909600  | 1.61805100  | -0.83143900 |
| P  | 0.37992100  | 3.84517600  | 0.59094800  |
| C  | -0.88833100 | 5.23819900  | 0.64921400  |
| C  | 0.13820600  | 3.00724600  | 3.29527500  |
| H  | -0.75090200 | 2.48334000  | 2.95407900  |
| C  | -0.48092500 | 6.53703500  | 1.02812200  |
| H  | 0.55889500  | 6.75019200  | 1.26623000  |
| C  | 0.93204700  | 3.73692500  | 2.38459800  |
| C  | 0.49278500  | 2.95122900  | 4.65492800  |
| H  | -0.13014600 | 2.39258300  | 5.34892300  |
| C  | -2.78426200 | 7.31897200  | 0.86146500  |
| H  | -3.51440900 | 8.12038900  | 0.94051600  |
| C  | 1.64570400  | 3.61675900  | 5.11573100  |
| H  | 1.91833800  | 3.57474500  | 6.16720100  |
| C  | 2.08592900  | 4.40321600  | 2.84822800  |
| H  | 2.71653400  | 4.97186600  | 2.17010400  |

|    |             |            |             |
|----|-------------|------------|-------------|
| C  | -2.24858600 | 4.98409700 | 0.38728400  |
| H  | -2.56907100 | 3.99443600 | 0.08256600  |
| C  | 2.44237700  | 4.33986700 | 4.20870600  |
| H  | 3.33349000  | 4.85650900 | 4.55620400  |
| C  | -3.19229600 | 6.02350800 | 0.49549600  |
| H  | -4.23971000 | 5.82102400 | 0.28747200  |
| C  | -1.42455500 | 7.57402400 | 1.12810300  |
| H  | -1.10230400 | 8.57015000 | 1.42003700  |
| S  | 1.82699200  | 0.95487200 | 0.62735400  |
| Cl | -1.50750400 | 3.00539000 | -2.27654600 |
| N  | 1.59728200  | 2.76519900 | -2.09181700 |
| H  | 2.47082200  | 2.32296100 | -1.76514700 |
| C  | 1.63382400  | 2.68776000 | -3.61007600 |
| H  | 0.61415200  | 2.83748300 | -3.96900000 |
| H  | 1.98487700  | 1.69853800 | -3.90397700 |
| C  | 2.58831800  | 3.83619800 | -4.06097000 |
| H  | 3.54926700  | 3.43961900 | -4.40389900 |
| H  | 2.14527000  | 4.39408500 | -4.89246400 |
| C  | 1.86347300  | 4.57035100 | -0.34756000 |
| H  | 1.93435900  | 5.65132700 | -0.19321800 |
| H  | 2.77842800  | 4.10234100 | 0.03514500  |
| C  | 1.67150700  | 4.26365200 | -1.83379100 |
| H  | 0.70542500  | 4.65940000 | -2.16960700 |
| C  | 2.77439600  | 4.74307400 | -2.80271600 |
| H  | 2.66841900  | 5.80763900 | -3.03559900 |
| H  | 3.76632800  | 4.59709000 | -2.35416600 |

**(P)-[Mo-(S<sub>N</sub>,S<sub>C</sub>)]<sup>+</sup>**

E = -2451.19680402 a.u.

|   |             |            |             |
|---|-------------|------------|-------------|
| H | 1.94741700  | 2.38003100 | -2.06311800 |
| H | -0.51561300 | 5.19387400 | -1.58025100 |
| H | 0.53214900  | 5.96882000 | -0.38560300 |
| H | -5.51193000 | 6.56050500 | 1.75777800  |
| H | -0.88934100 | 2.75588100 | 3.13765100  |
| H | -5.57309100 | 4.36800700 | 0.56211100  |
| H | 1.91155900  | 5.49623000 | 1.27702700  |
| H | 2.30143500  | 4.51553800 | 5.45393400  |
| H | 0.30020700  | 3.02352300 | 5.29467600  |
| H | -3.31221400 | 7.56338200 | 2.39565200  |
| H | 3.09444600  | 5.74140100 | 3.42686900  |
| H | 2.24281700  | 4.13337300 | -0.70995200 |
| H | -3.45874000 | 3.20089700 | -0.01853500 |
| H | -1.20311900 | 6.38287200 | 1.86251000  |
| H | 1.47820100  | 6.08890600 | -2.78439100 |
| H | 3.09893500  | 5.46575100 | -2.46286300 |
| H | 2.88800900  | 3.73809100 | -4.10602500 |
| H | 1.69098000  | 4.83566400 | -4.81375600 |
| H | -0.16007400 | 3.67602600 | -3.65207500 |
| H | 0.88946600  | 2.32004200 | -4.10222300 |
| C | 0.25654200  | 5.00455500 | -0.82675600 |
| C | 0.42013000  | 4.10540700 | 2.04617000  |
| C | -2.18396300 | 4.70856800 | 0.87249600  |

|    |             |             |             |
|----|-------------|-------------|-------------|
| C  | -4.58640200 | 6.04552900  | 1.51289600  |
| C  | -0.02120900 | 3.40886500  | 3.19313200  |
| C  | -4.62001500 | 4.81024800  | 0.84074400  |
| C  | 1.54879000  | 4.94408500  | 2.13970000  |
| C  | 1.78069600  | 4.39892400  | 4.50698600  |
| C  | 0.65325400  | 3.55831200  | 4.41670300  |
| C  | -3.34730800 | 6.61227500  | 1.87076800  |
| C  | 2.22673900  | 5.08945700  | 3.36592700  |
| C  | 1.47975000  | 4.32802500  | -1.47156800 |
| C  | -3.42338900 | 4.14155500  | 0.51805400  |
| C  | -2.15041700 | 5.94529300  | 1.55698400  |
| C  | 2.06253600  | 5.17035500  | -2.65588200 |
| C  | 1.94521400  | 4.26480400  | -3.91490100 |
| C  | 0.84132700  | 3.25665100  | -3.54389000 |
| N  | 1.09754100  | 2.97335300  | -2.07290200 |
| P  | -0.54927900 | 3.87038100  | 0.45382800  |
| S  | 1.57668000  | 1.30188500  | 0.63497500  |
| S  | 0.00265600  | -0.00392300 | -2.66258600 |
| Cl | -2.11538200 | 2.61359400  | -2.28877700 |
| Mo | -0.25518500 | 1.59720600  | -0.83381300 |
| H  | -3.02211700 | 0.49979200  | -2.07247400 |
| H  | -4.27943700 | -3.02262900 | -1.56548300 |
| H  | -5.45319700 | -2.47533400 | -0.36241600 |
| H  | -2.97887700 | -8.05342300 | 1.73905600  |
| H  | -1.94895300 | -2.21469000 | 3.14948500  |
| H  | -1.04065600 | -7.02114600 | 0.54857800  |
| H  | -5.68442700 | -1.01948900 | 1.29447800  |
| H  | -5.01590400 | -0.26901200 | 5.48351400  |
| H  | -2.75321800 | -1.32184400 | 5.31520700  |
| H  | -4.93908900 | -6.63835200 | 2.37584200  |
| H  | -6.46622900 | -0.12426800 | 3.45439900  |
| H  | -4.68108100 | -0.09234300 | -0.70045900 |
| H  | -1.07095100 | -4.60377800 | -0.02792500 |
| H  | -4.95254800 | -4.21899000 | 1.84955300  |
| H  | -6.03981300 | -1.71495500 | -2.75464700 |
| H  | -6.26700000 | 0.00950700  | -2.45053500 |
| H  | -4.67020800 | 0.63361000  | -4.11667900 |
| H  | -5.04949900 | -0.95703900 | -4.79753300 |
| H  | -3.12400200 | -1.98944000 | -3.63584900 |
| H  | -2.45864400 | -0.41604800 | -4.10626800 |
| C  | -4.47955800 | -2.25216400 | -0.81281300 |
| C  | -3.75630900 | -1.68847500 | 2.05987600  |
| C  | -3.01066800 | -4.24313600 | 0.86357000  |
| C  | -2.98793000 | -6.99376900 | 1.49647400  |
| C  | -2.93576500 | -1.76067300 | 3.20764900  |
| C  | -1.89611900 | -6.41133200 | 0.82759200  |
| C  | -5.02911000 | -1.09160700 | 2.15823100  |
| C  | -4.66461200 | -0.66025800 | 4.53220900  |
| C  | -3.38979600 | -1.25334300 | 4.43680900  |
| C  | -4.09376600 | -6.19741700 | 1.85401300  |
| C  | -5.48119000 | -0.57946500 | 3.39012900  |
| C  | -4.48622400 | -0.85616300 | -1.46140200 |
| C  | -1.90536600 | -5.03975100 | 0.50815200  |
| C  | -4.10416700 | -4.82653100 | 1.54390100  |
| C  | -5.51249200 | -0.76080800 | -2.64004900 |
| C  | -4.66994300 | -0.44310100 | -3.90855800 |

|    |             |             |             |
|----|-------------|-------------|-------------|
| C  | -3.24939500 | -0.90994100 | -3.53878000 |
| N  | -3.12103500 | -0.53211300 | -2.07213900 |
| P  | -3.08615700 | -2.40536700 | 0.45705600  |
| S  | -1.91627300 | 0.71300200  | 0.63434000  |
| Cl | -1.20997400 | -3.14006900 | -2.28951900 |
| Mo | -1.25675400 | -1.02345000 | -0.83426300 |
| H  | 1.08260400  | -2.86858800 | -2.07688500 |
| H  | 4.76166800  | -2.19442700 | -1.56048400 |
| H  | 4.87133500  | -3.48144000 | -0.35316300 |
| H  | 8.46980200  | 1.45232400  | 1.72962000  |
| H  | 2.92413200  | -0.56898400 | 3.15350100  |
| H  | 6.56973800  | 2.63739100  | 0.62276800  |
| H  | 3.71675100  | -4.40899500 | 1.29796100  |
| H  | 2.75210600  | -4.19498000 | 5.49131700  |
| H  | 2.55235300  | -1.70728400 | 5.32285800  |
| H  | 8.26023100  | -0.97581900 | 2.28747000  |
| H  | 3.33263000  | -5.52928000 | 3.46087000  |
| H  | 2.42206500  | -4.00322000 | -0.69225900 |
| H  | 4.49005600  | 1.40418400  | 0.05090100  |
| H  | 6.17208000  | -2.19792700 | 1.76627900  |
| H  | 4.50851900  | -4.38889600 | -2.73535400 |
| H  | 3.11313800  | -5.43104300 | -2.44442400 |
| H  | 1.80942100  | -4.35583200 | -4.13054100 |
| H  | 3.38529900  | -3.88345700 | -4.78618300 |
| H  | 3.29771600  | -1.70578300 | -3.62319600 |
| H  | 1.60604800  | -1.91708000 | -4.10468100 |
| C  | 4.19317600  | -2.75045700 | -0.80713300 |
| C  | 3.34934700  | -2.40164500 | 2.06410700  |
| C  | 5.18427500  | -0.48032300 | 0.86012500  |
| C  | 7.55623200  | 0.91458800  | 1.48880400  |
| C  | 3.01445700  | -1.65127300 | 3.21299800  |
| C  | 6.48533500  | 1.58152200  | 0.86671700  |
| C  | 3.45952400  | -3.80310600 | 2.16259300  |
| C  | 2.91488800  | -3.69686800 | 4.53902500  |
| C  | 2.80201400  | -2.29542000 | 4.44350600  |
| C  | 7.43971500  | -0.45409600 | 1.80179800  |
| C  | 3.24262500  | -4.44791500 | 3.39604300  |
| C  | 2.98691000  | -3.45567900 | -1.45488400 |
| C  | 5.30150200  | 0.88780800  | 0.54933700  |
| C  | 6.25708800  | -1.14853500 | 1.49413400  |
| C  | 3.41741000  | -4.39600100 | -2.63073900 |
| C  | 2.73797200  | -3.81740700 | -3.90577500 |
| C  | 2.42596300  | -2.35543300 | -3.53285200 |
| N  | 2.02501900  | -2.43702700 | -2.06973000 |
| P  | 3.62951700  | -1.46529200 | 0.45910700  |
| S  | 0.33950700  | -2.02148400 | 0.63277700  |
| Cl | 3.32661400  | 0.52570100  | -2.27964400 |
| Mo | 1.51366600  | -0.57975800 | -0.83272000 |

$(M)-[\text{Mo}-(S_N, R_C)]^+$ 

E = -2451.16325534 a.u.

|    |             |             |             |
|----|-------------|-------------|-------------|
| Mo | -1.59728400 | -0.40354300 | -0.93725000 |
| P  | -3.75206000 | -1.00722900 | 0.51686900  |
| C  | -3.57479100 | -1.59584400 | 2.29991300  |
| C  | -5.20595400 | 1.06668500  | 1.79630600  |
| H  | -4.42981800 | 1.00868200  | 2.55435600  |
| C  | -4.54642700 | -2.44931400 | 2.86697500  |
| H  | -5.39543100 | -2.79421600 | 2.28177100  |
| C  | -5.18453200 | 0.20445500  | 0.67784500  |
| C  | -6.24095300 | 2.00525700  | 1.95023200  |
| H  | -6.24555300 | 2.66122800  | 2.81711700  |
| C  | -3.38446200 | -2.38056800 | 5.01044200  |
| H  | -3.31030100 | -2.68460000 | 6.05141200  |
| C  | -7.26836200 | 2.08932100  | 0.99139300  |
| H  | -8.07304500 | 2.80984200  | 1.11349100  |
| C  | -6.20396900 | 0.30600900  | -0.29113700 |
| H  | -6.19586500 | -0.31002300 | -1.18467600 |
| C  | -2.51782700 | -1.12469600 | 3.10477000  |
| H  | -1.77364400 | -0.45320000 | 2.68623400  |
| C  | -7.24596600 | 1.23722100  | -0.12783300 |
| H  | -8.02911100 | 1.30058900  | -0.87892000 |
| C  | -2.42454500 | -1.51547800 | 4.45417600  |
| H  | -1.60568100 | -1.14689600 | 5.06715900  |
| C  | -4.44823900 | -2.84481900 | 4.21281600  |
| H  | -5.20242500 | -3.50243500 | 4.63704200  |
| S  | -0.01904000 | -0.01717700 | -2.78382500 |
| S  | -1.43694100 | 1.51078100  | 0.46105900  |
| Cl | -3.44023100 | 0.88220700  | -2.24624800 |
| N  | -2.69981700 | -1.98483300 | -2.18434900 |
| H  | -3.45360000 | -1.35389900 | -2.49099000 |
| C  | -2.15233200 | -2.62686700 | -3.46164700 |
| H  | -1.06673100 | -2.63686500 | -3.43484700 |
| H  | -2.48655300 | -2.01578500 | -4.30637700 |
| C  | -2.72589500 | -4.07087000 | -3.49781600 |
| H  | -3.09169600 | -4.33812400 | -4.49416300 |
| H  | -1.93858300 | -4.78243900 | -3.22571600 |
| C  | -4.42412700 | -2.51244900 | -0.44428100 |
| H  | -4.76544500 | -3.27502300 | 0.26092600  |
| H  | -5.28966300 | -2.19119100 | -1.03354500 |
| C  | -3.34589800 | -3.09803100 | -1.36868400 |
| H  | -2.55225700 | -3.57271100 | -0.78283700 |
| C  | -3.85469100 | -4.08866200 | -2.43734700 |
| H  | -4.02628000 | -5.08766700 | -2.02311600 |
| H  | -4.80332100 | -3.73164600 | -2.86395600 |
| Mo | 0.44502700  | 1.56346500  | -0.95671200 |
| P  | 1.03297500  | 3.74261200  | 0.48085000  |
| C  | 0.40326100  | 3.90667900  | 2.25032100  |
| C  | 3.50697700  | 4.08976300  | 1.84887400  |
| H  | 3.03036300  | 3.54650200  | 2.65948300  |
| C  | 0.13434700  | 5.18002200  | 2.79824700  |
| H  | 0.26957100  | 6.08146800  | 2.20580700  |
| C  | 2.80111700  | 4.36884100  | 0.65756400  |

|    |             |             |             |
|----|-------------|-------------|-------------|
| C  | 4.83435000  | 4.52643200  | 2.00654600  |
| H  | 5.36455200  | 4.30761800  | 2.92983700  |
| C  | -0.42915500 | 4.16129300  | 4.94149500  |
| H  | -0.75260800 | 4.25920200  | 5.97460600  |
| C  | 5.46970800  | 5.24855800  | 0.97899400  |
| H  | 6.49357900  | 5.59165400  | 1.10367000  |
| C  | 3.44799700  | 5.07645700  | -0.37769400 |
| H  | 2.95070800  | 5.26619400  | -1.32290900 |
| C  | 0.27114200  | 2.76433800  | 3.06590600  |
| H  | 0.49518100  | 1.78066000  | 2.66381900  |
| C  | 4.77203900  | 5.52139700  | -0.21219600 |
| H  | 5.25669000  | 6.06928100  | -1.01596500 |
| C  | -0.14304000 | 2.89236300  | 4.40536800  |
| H  | -0.24254900 | 2.00544800  | 5.02629700  |
| C  | -0.28592800 | 5.30643000  | 4.13431500  |
| H  | -0.49047200 | 6.29226300  | 4.54343900  |
| S  | 2.01978700  | 0.48283000  | 0.45645900  |
| Cl | 2.47414100  | 2.48195400  | -2.29902100 |
| N  | -0.37235300 | 3.30740100  | -2.21009800 |
| H  | 0.54752400  | 3.62711400  | -2.54394900 |
| C  | -1.23657500 | 3.14658200  | -3.46332000 |
| H  | -1.79992600 | 2.21983800  | -3.41011900 |
| H  | -0.56277900 | 3.10825800  | -4.32546600 |
| C  | -2.18464600 | 4.37797400  | -3.49344300 |
| H  | -2.25644400 | 4.81200900  | -4.49559500 |
| H  | -3.19065700 | 4.07058800  | -3.18675900 |
| C  | 0.10276700  | 5.08158300  | -0.50853800 |
| H  | -0.35305200 | 5.80005700  | 0.17775700  |
| H  | 0.83023000  | 5.62335600  | -1.12315600 |
| C  | -0.97562900 | 4.44640800  | -1.39748600 |
| H  | -1.77551200 | 4.01798200  | -0.78524300 |
| C  | -1.59154400 | 5.37396400  | -2.46585600 |
| H  | -2.34918800 | 6.04177900  | -2.04266500 |
| H  | -0.80939700 | 5.99640300  | -2.92414800 |
| Mo | 1.12494400  | -1.18707300 | -0.94353100 |
| P  | 2.74185800  | -2.74375100 | 0.51114000  |
| C  | 3.18741800  | -2.24160400 | 2.27281900  |
| C  | 1.88209800  | -5.06524800 | 1.92501900  |
| H  | 1.65657600  | -4.37899900 | 2.73586200  |
| C  | 4.43867200  | -2.59161100 | 2.82517000  |
| H  | 5.17313900  | -3.13942700 | 2.24019000  |
| C  | 2.43732400  | -4.59206900 | 0.71544400  |
| C  | 1.62768900  | -6.43717800 | 2.10079500  |
| H  | 1.20318600  | -6.78770600 | 3.03807700  |
| C  | 3.80172800  | -1.58989900 | 4.95624600  |
| H  | 4.03951500  | -1.33662200 | 5.98623700  |
| C  | 1.92778000  | -7.35093200 | 1.07328200  |
| H  | 1.73777600  | -8.41219000 | 1.21191300  |
| C  | 2.71740000  | -5.50895100 | -0.32005500 |
| H  | 3.09747000  | -5.17231400 | -1.27879800 |
| C  | 2.23981700  | -1.57937800 | 3.08024700  |
| H  | 1.26566700  | -1.32115000 | 2.67489100  |
| C  | 2.47251300  | -6.88182800 | -0.13644900 |
| H  | 2.69768400  | -7.57758600 | -0.94039600 |
| C  | 2.54616600  | -1.25658600 | 4.41580700  |
| H  | 1.80812100  | -0.74672600 | 5.03017400  |



|    |             |             |             |
|----|-------------|-------------|-------------|
| C  | 4.74702600  | -2.26134700 | 4.15716700  |
| H  | 5.71465000  | -2.53515400 | 4.56933400  |
| S  | -0.59435200 | -1.99349300 | 0.48432800  |
| Cl | 0.89372400  | -3.42287100 | -2.24761300 |
| N  | 3.03188700  | -1.36899200 | -2.21162900 |
| H  | 2.85576300  | -2.33670400 | -2.51568900 |
| C  | 3.30003100  | -0.57348200 | -3.49062500 |
| H  | 2.78158400  | 0.37962500  | -3.44620800 |
| H  | 2.90958700  | -1.15720600 | -4.33043000 |
| C  | 4.84039200  | -0.37158800 | -3.55810200 |
| H  | 5.23350500  | -0.56849600 | -4.56036200 |
| H  | 5.08302300  | 0.66477200  | -3.29846400 |
| C  | 4.36335300  | -2.59962800 | -0.48467600 |
| H  | 5.21343400  | -2.52632100 | 0.19884600  |
| H  | 4.48633700  | -3.51792300 | -1.06960400 |
| C  | 4.32992500  | -1.37842200 | -1.41492300 |
| H  | 4.36204400  | -0.45022800 | -0.83539300 |
| C  | 5.42642800  | -1.34040900 | -2.50040000 |
| H  | 6.38695200  | -0.99632100 | -2.10271000 |
| H  | 5.57577600  | -2.34442300 | -2.92351500 |

**(M)-[Mo-(S<sub>N</sub>S<sub>C</sub>)]<sup>+</sup>**

E = -2451.16396395 a.u.

|   |            |             |             |
|---|------------|-------------|-------------|
| H | 3.05030000 | -0.00337200 | -2.89164900 |
| H | 5.42180600 | -0.96189100 | -0.04269800 |
| H | 5.52013600 | -2.59646900 | -0.70434100 |
| H | 4.78763400 | -0.95610300 | 5.86411100  |
| H | 2.30491100 | -4.06215000 | 2.40428900  |
| H | 2.46648200 | -0.49375200 | 5.06506500  |
| H | 4.13721300 | -4.34507300 | -1.51555400 |
| H | 3.05089900 | -7.92345000 | 0.62865600  |
| H | 2.17291400 | -6.53050500 | 2.51141200  |
| H | 6.47168400 | -1.92216900 | 4.28992200  |
| H | 4.03945900 | -6.80766000 | -1.37853300 |
| H | 4.19974100 | -1.99494300 | -2.66481400 |
| H | 1.83742000 | -0.97450100 | 2.70732800  |
| H | 5.84596600 | -2.43034100 | 1.95233800  |
| H | 6.68632400 | -0.73980000 | -2.22468900 |
| H | 5.78460800 | -0.59246400 | -3.73222900 |
| H | 5.31443000 | 1.65999800  | -3.29371900 |
| H | 6.27232700 | 1.58281800  | -1.81363300 |
| H | 4.35717500 | 1.04830200  | -0.45703000 |
| H | 3.52226500 | 1.98256600  | -1.70794600 |
| C | 4.87567000 | -1.71543600 | -0.61963200 |
| C | 3.24458700 | -4.01951300 | 0.44272300  |
| C | 3.79648400 | -1.71907100 | 2.15648000  |
| C | 4.51184300 | -1.16894300 | 4.83440000  |
| C | 2.67735600 | -4.65150400 | 1.57091800  |
| C | 3.20470000 | -0.90904900 | 4.38360500  |
| C | 3.72737100 | -4.80737200 | -0.62341600 |
| C | 3.09960600 | -6.83881500 | 0.57506300  |
| C | 2.60531800 | -6.05460000 | 1.63498400  |

|    |             |             |             |
|----|-------------|-------------|-------------|
| C  | 5.46236900  | -1.71063000 | 3.94658500  |
| C  | 3.66015200  | -6.21098800 | -0.55301000 |
| C  | 4.53916100  | -1.18122500 | -2.02622400 |
| C  | 2.84737500  | -1.18157800 | 3.04871300  |
| C  | 5.10546400  | -1.98958500 | 2.61563600  |
| C  | 5.73529600  | -0.40563100 | -2.65389400 |
| C  | 5.45355400  | 1.10332800  | -2.36015400 |
| C  | 4.14954500  | 1.11293900  | -1.52748400 |
| N  | 3.41210500  | -0.15103800 | -1.93968600 |
| P  | 3.31955100  | -2.14104500 | 0.38568300  |
| S  | -0.01857900 | -2.04437000 | 0.57809400  |
| S  | -0.00205400 | -0.00393000 | -2.69487000 |
| Cl | 1.80246700  | -2.69804300 | -2.55248500 |
| Mo | 1.41422200  | -0.82837900 | -0.87692100 |
| H  | -1.46253700 | 2.68394400  | -2.91499500 |
| H  | -1.90019000 | 5.13040200  | -0.01483600 |
| H  | -0.54129600 | 6.07954600  | -0.62729400 |
| H  | -1.54303900 | 4.53012200  | 5.90076500  |
| H  | 2.37745000  | 4.01059000  | 2.41089500  |
| H  | -0.78584900 | 2.30006500  | 5.06700100  |
| H  | 1.67189900  | 5.74926100  | -1.49931300 |
| H  | 5.32792300  | 6.59944800  | 0.61928600  |
| H  | 4.57847600  | 5.13573300  | 2.50417700  |
| H  | -1.55591800 | 6.49384100  | 4.35366800  |
| H  | 3.85121400  | 6.89946000  | -1.37553600 |
| H  | -0.33034400 | 4.67018000  | -2.61735800 |
| H  | -0.06654100 | 2.02820200  | 2.70201600  |
| H  | -0.81333800 | 6.23834700  | 2.00900200  |
| H  | -2.67545700 | 6.18278700  | -2.19569300 |
| H  | -2.30347500 | 5.37673100  | -3.71857100 |
| H  | -4.02129100 | 3.82161900  | -3.38051800 |
| H  | -4.48995500 | 4.65130100  | -1.89547000 |
| H  | -3.11614800 | 3.22612900  | -0.52266400 |
| H  | -3.45815900 | 2.07067900  | -1.81964100 |
| C  | -0.96315400 | 5.07040200  | -0.57842200 |
| C  | 1.85276800  | 4.80738300  | 0.45554700  |
| C  | -0.40136600 | 4.10564600  | 2.18234400  |
| C  | -1.22489300 | 4.41236500  | 4.86803800  |
| C  | 2.69299200  | 4.63120700  | 1.57675300  |
| C  | -0.79807700 | 3.15671100  | 4.39757500  |
| C  | 2.28367200  | 5.62354500  | -0.61178400 |
| C  | 4.36508500  | 6.09709800  | 0.57194300  |
| C  | 3.94318600  | 5.27315800  | 1.63292700  |
| C  | -1.23504100 | 5.51889300  | 3.99568000  |
| C  | 3.53190100  | 6.26968100  | -0.54921500 |
| C  | -1.22067900 | 4.54348100  | -2.00326100 |
| C  | -0.38932300 | 3.00203700  | 3.05873800  |
| C  | -0.82038800 | 5.36783400  | 2.66087900  |
| C  | -2.47295400 | 5.20644000  | -2.64976800 |
| C  | -3.64417700 | 4.19796600  | -2.42281500 |
| C  | -3.02784200 | 3.04410100  | -1.59662000 |
| N  | -1.54992000 | 3.04968100  | -1.95719200 |
| P  | 0.19091400  | 3.92892600  | 0.40620000  |
| S  | 1.76458400  | 1.00232000  | 0.58715300  |
| Cl | 1.44824100  | 2.90335700  | -2.55212800 |
| Mo | 0.00629400  | 1.64039200  | -0.87883200 |

|    |             |             |             |
|----|-------------|-------------|-------------|
| H  | -1.61521300 | -2.61541000 | -2.90726500 |
| H  | -3.48407700 | -4.20748200 | 0.01848500  |
| H  | -4.99388300 | -3.52112000 | -0.59340100 |
| H  | -3.17710300 | -3.54118200 | 5.93098800  |
| H  | -4.70477300 | 0.04306200  | 2.41893600  |
| H  | -1.60406800 | -1.79725600 | 5.07923300  |
| H  | -5.80242600 | -1.42613500 | -1.51023100 |
| H  | -8.41721500 | 1.27588500  | 0.59770000  |
| H  | -6.79372300 | 1.36688200  | 2.49810200  |
| H  | -4.88277900 | -4.52922000 | 4.39361600  |
| H  | -7.90472700 | -0.13767300 | -1.39983200 |
| H  | -3.89200000 | -2.63726200 | -2.59297500 |
| H  | -1.72005400 | -1.05944200 | 2.70876700  |
| H  | -5.02395800 | -3.78017200 | 2.04190200  |
| H  | -4.01473600 | -5.42659300 | -2.14719900 |
| H  | -3.53797200 | -4.70645000 | -3.68402700 |
| H  | -1.31702400 | -5.38767300 | -3.38618600 |
| H  | -1.77084100 | -6.22311600 | -1.89960400 |
| H  | -1.22713300 | -4.32200300 | -0.52223500 |
| H  | -0.06696700 | -4.03178800 | -1.82769300 |
| C  | -3.90962100 | -3.37453800 | -0.55110500 |
| C  | -5.10471500 | -0.80273500 | 0.45514700  |
| C  | -3.36537500 | -2.37599200 | 2.19968800  |
| C  | -3.22984300 | -3.21696100 | 4.89477500  |
| C  | -5.39116300 | 0.00467100  | 1.57765600  |
| C  | -2.34434900 | -2.23489900 | 4.41418700  |
| C  | -6.01587200 | -0.84124800 | -0.62148200 |
| C  | -7.49454500 | 0.70261900  | 0.55628200  |
| C  | -6.58052400 | 0.75386000  | 1.62612200  |
| C  | -4.18955100 | -3.77614000 | 4.02795500  |
| C  | -7.20821300 | -0.09645900 | -0.56643800 |
| C  | -3.33252700 | -3.34165900 | -1.97911000 |
| C  | -2.40988000 | -1.81587900 | 3.07106900  |
| C  | -4.26061000 | -3.35434500 | 2.68877500  |
| C  | -3.28411300 | -4.76087100 | -2.61977800 |
| C  | -1.81740700 | -5.26050200 | -2.41943800 |
| C  | -1.12291800 | -4.15030100 | -1.59618500 |
| N  | -1.87511400 | -2.87584100 | -1.94628800 |
| P  | -3.50575500 | -1.79239300 | 0.41689100  |
| S  | -1.76951000 | 1.03404800  | 0.57166600  |
| Cl | -3.23879700 | -0.21178500 | -2.56716200 |
| Mo | -1.43118700 | -0.81624300 | -0.87834100 |
